# Supplementary material for: Effect of Ions and Sequence Variants on the Antagonist Binding Properties of the Histamine H1 Receptor
Source: MDPI journal article supplement (doi:10.3390/ijms23031420), 2022-01-26
Supplement: s1 [file s1]

# Supplementary Material: Effect of ions and sequence variants on the antagonist binding properties of the histamine H<sub>1</sub> receptor

Marcus Conrad <sup>1</sup> , Christian A. Söldner <sup>1</sup>  and Heinrich Sticht <sup>1,2\*</sup> 

## A

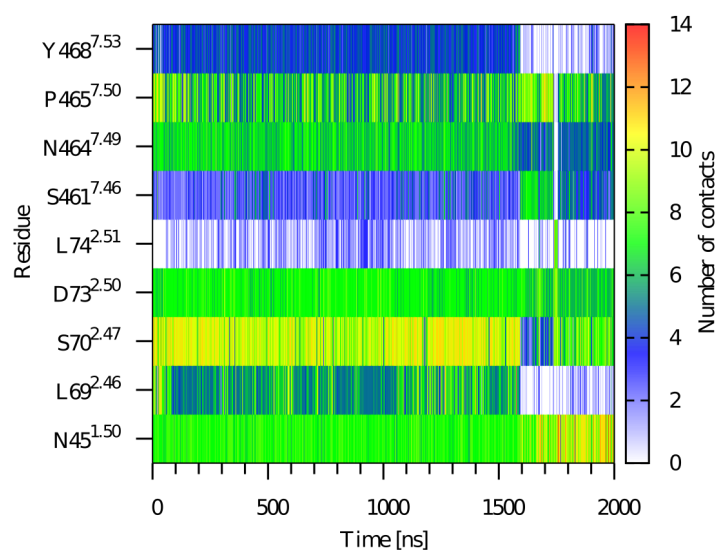

## B

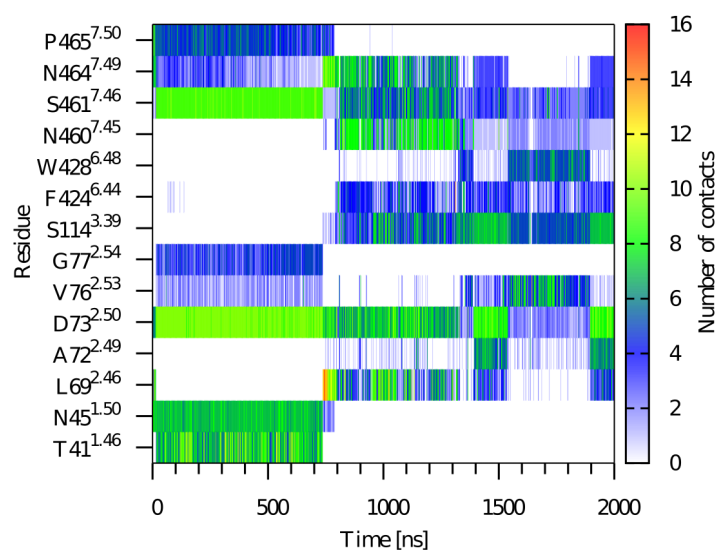

**C**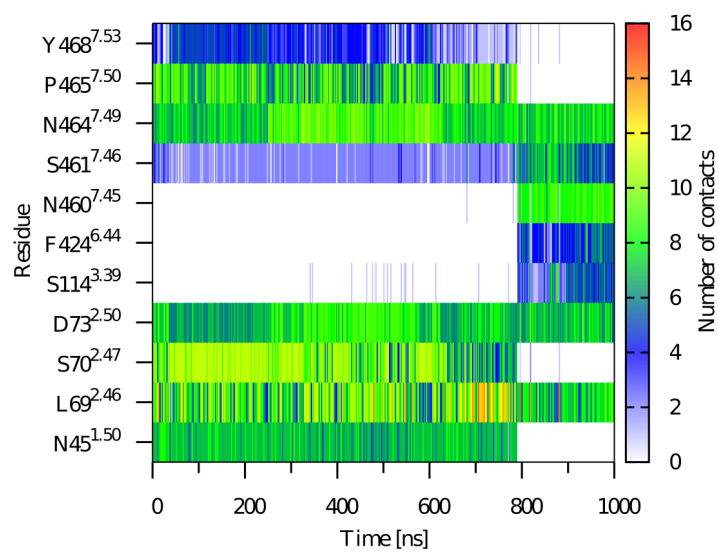**D**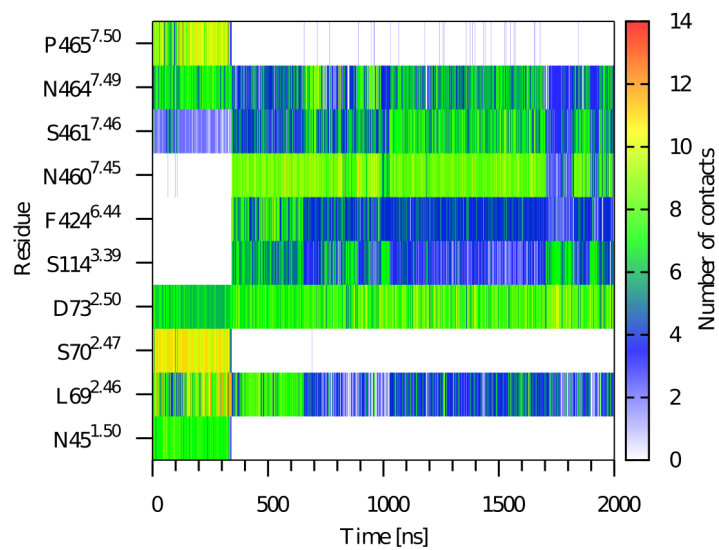

**E**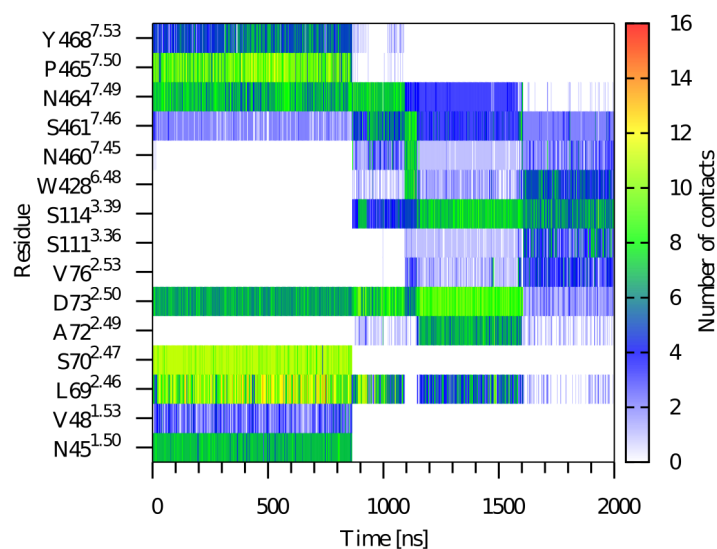**F**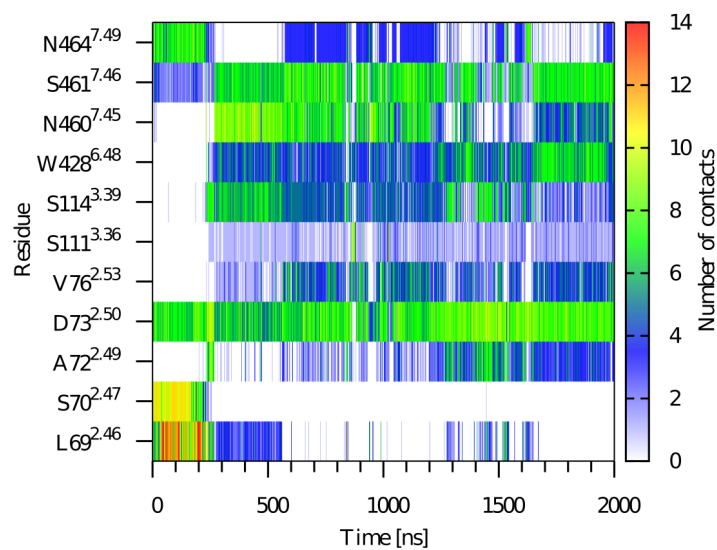

**Figure S1. Sodium Interactions** Number of contacts between Na<sup>+</sup> and H<sub>1</sub>R over the simulation time. The simulation time is shown as horizontal axis and the interacting H<sub>1</sub>R residues on the vertical axis. The number of contacts is color coded according to the scale shown on the right side of each panel. The Panels A-F represent the runs 1-4,9,10 found in Table 3 (main document).

A

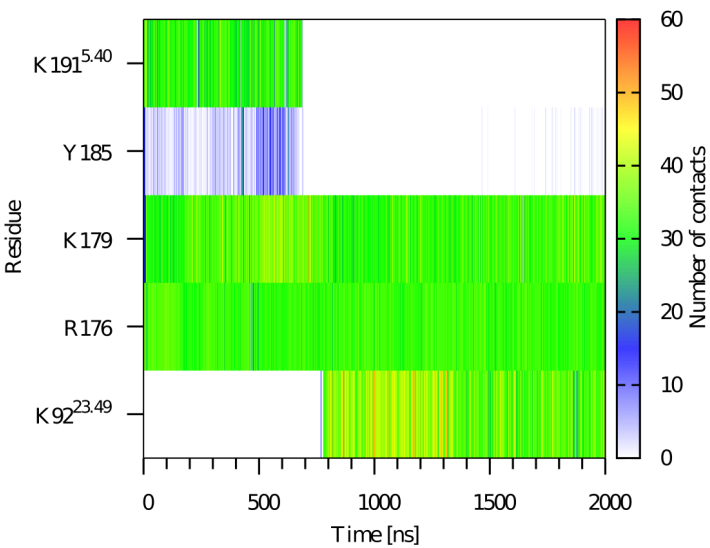

B

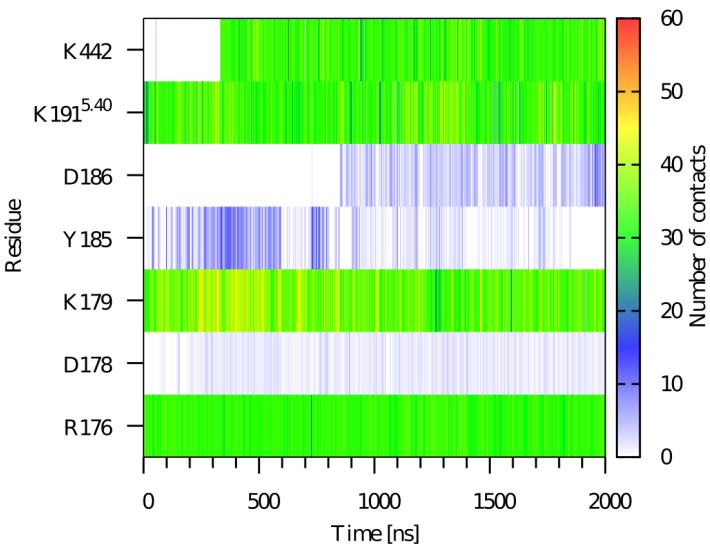

C

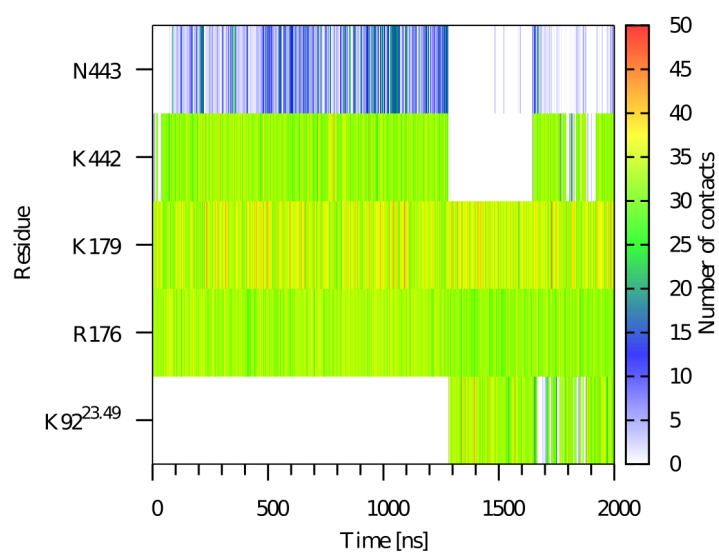

D

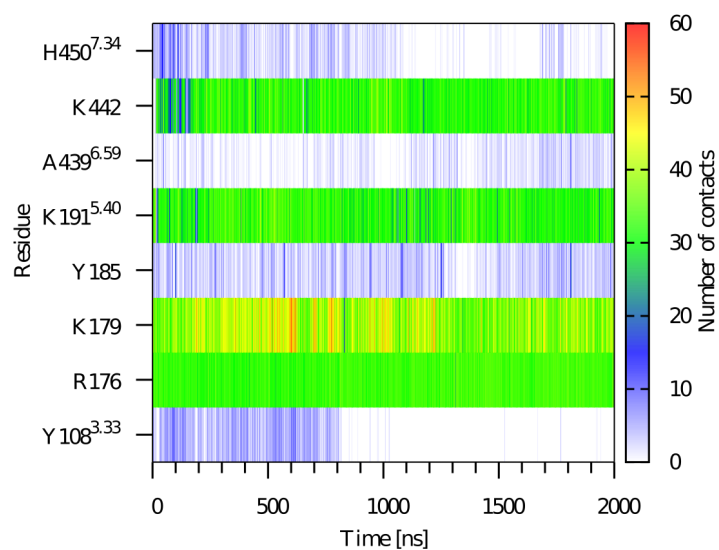

**Figure S2. Phosphate Interactions** Number of contacts between phosphate ion and H<sub>1</sub>R over the simulation time. The simulation time is shown as horizontal axis and the interacting H<sub>1</sub>R residues on the vertical axis. The number of contacts is color coded according to the scale shown on the right side of each panel. The Panels A-D represent the runs 3,4,7,8 found in Table 3 (main document).

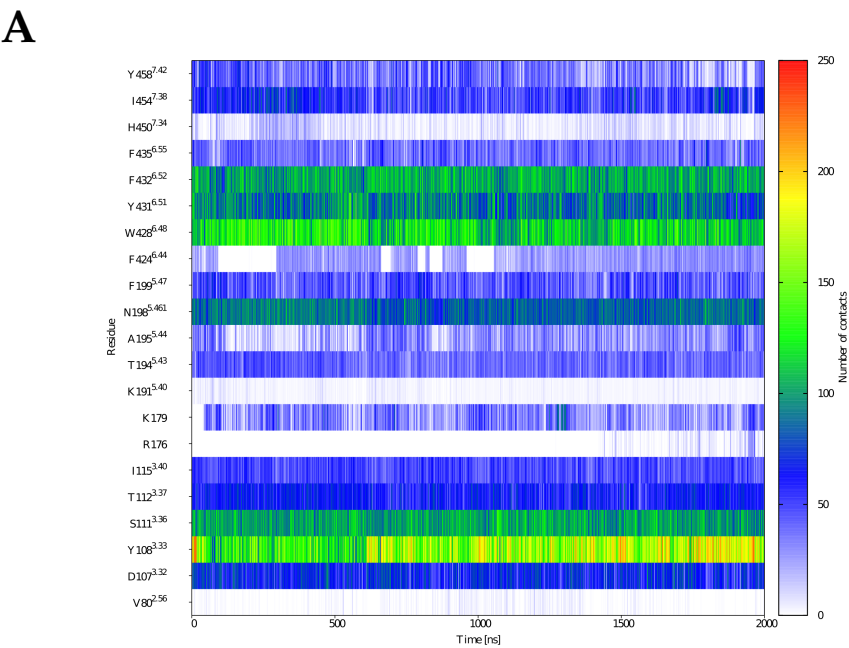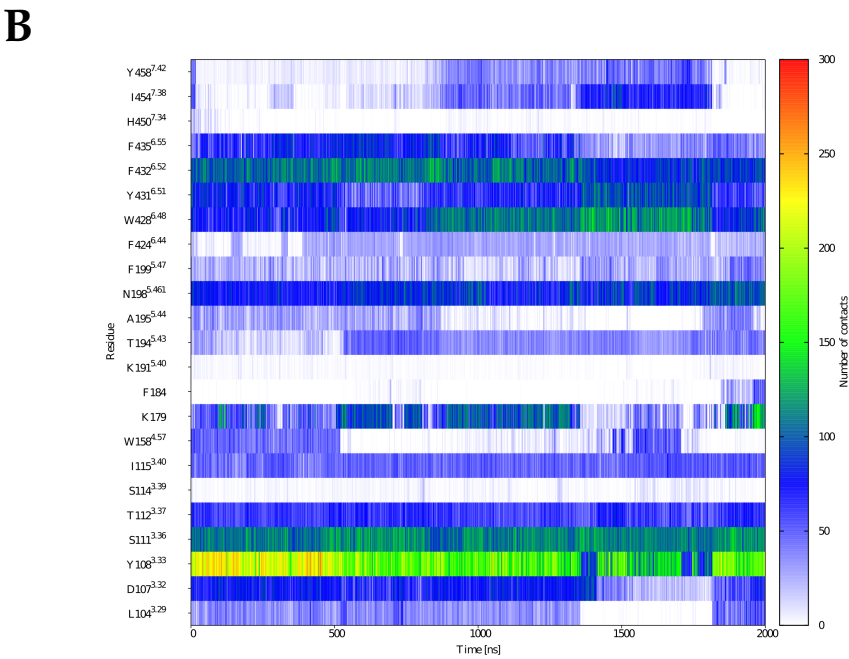

C

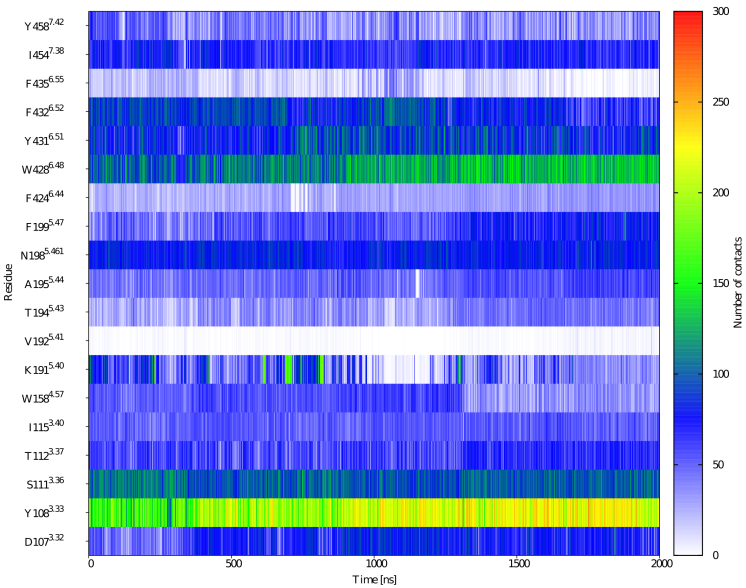

D

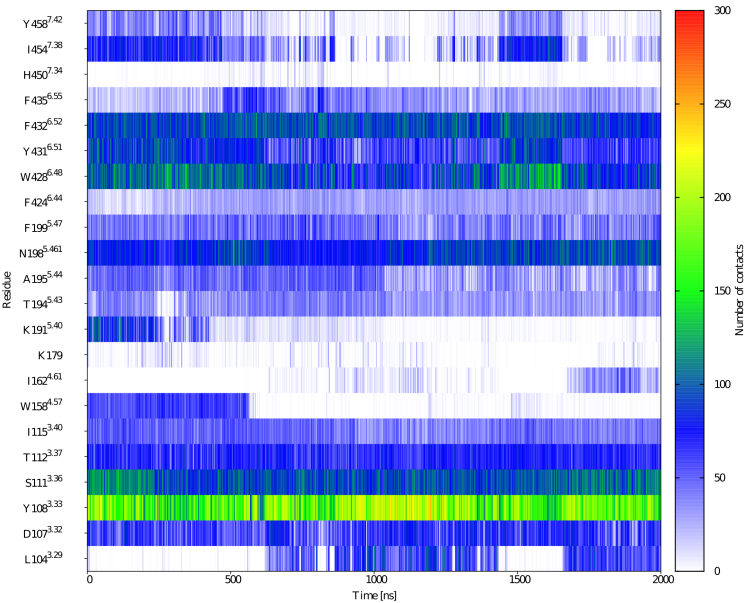

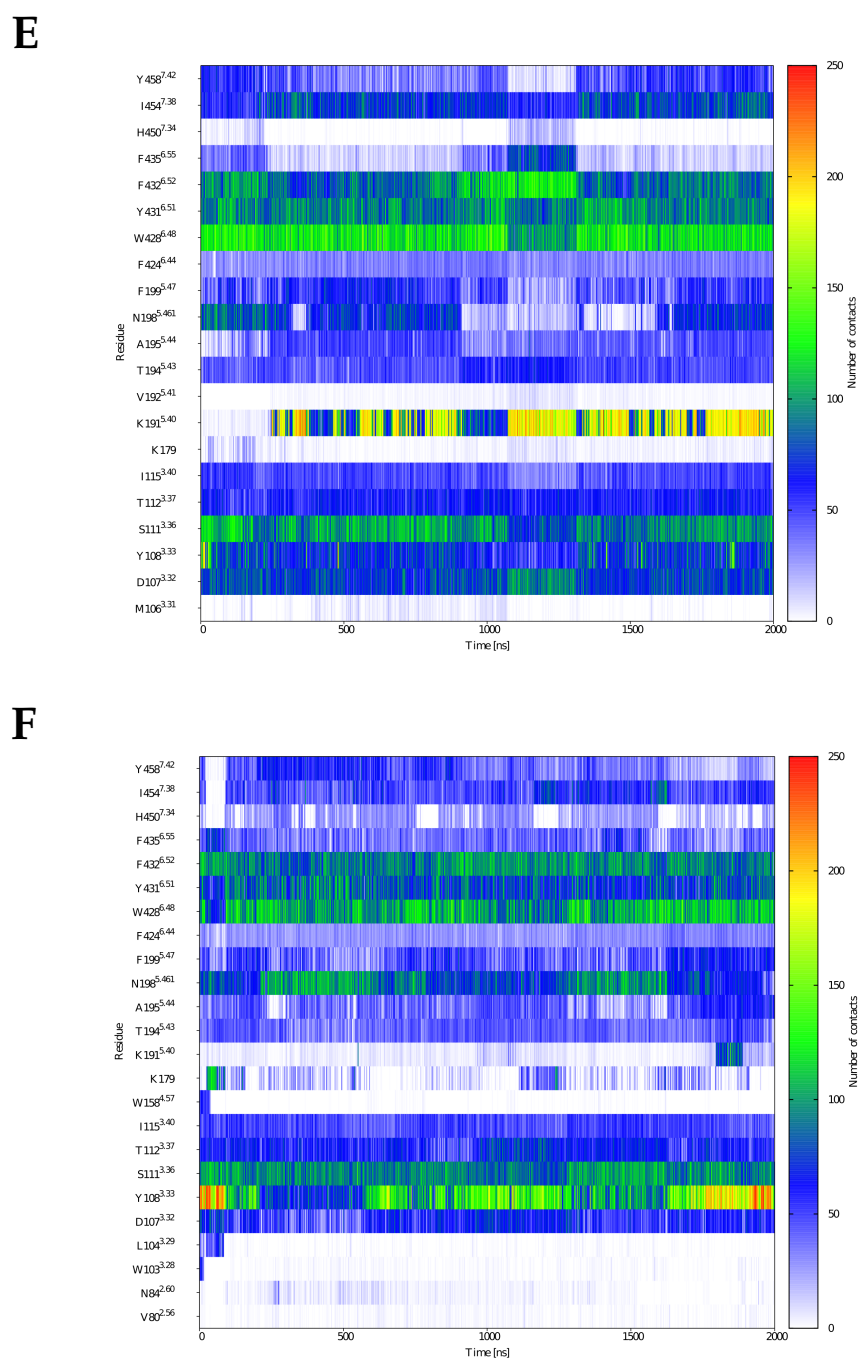

**Figure S3. Doxepin Interactions** Number of contacts between doxepin and H<sub>1</sub>R over the simulation time. The simulation time is shown as horizontal axis and the interacting H<sub>1</sub>R residues on the vertical axis. The number of contacts is color coded according to the scale shown on the right side of each panel. The Panels A-F represent the runs1-6 found in Table 3 (main document).
